# Supplementary material
Source: PubMed Central journal article supplement (PMC8786767)

**SARS-CoV-2 spike glycoprotein S1 induces neuroinflammation in BV-2 microglia**

**Olumayokun A Olajide\*\*, Victoria U Iwuanyanwu, Oyinkansola D Adegbola, Alaa A Al-Hindawi**

**Department of Pharmacy, School of Applied Sciences, University of Huddersfield, Queensgate, Huddersfield, HD1 3DH, United Kingdom**

**+ ORCID ID: 0000-0002-9254-8334**

**\*Address for correspondence:**

Dr Olumayokun A Olajide  
Department of Pharmacy, University of Huddersfield  
Queensgate, Huddersfield, HD1 3DH, United Kingdom  
Email: [o.a.olajide@hud.ac.uk](mailto:o.a.olajide@hud.ac.uk)

## Supplementary Data

Effects of 10, 50, 100, 500 and 1000 ng/mL of S1 on TNF $\alpha$  production following stimulation of BV-2 microglia for 1, 3, 6, 12 and 24 h

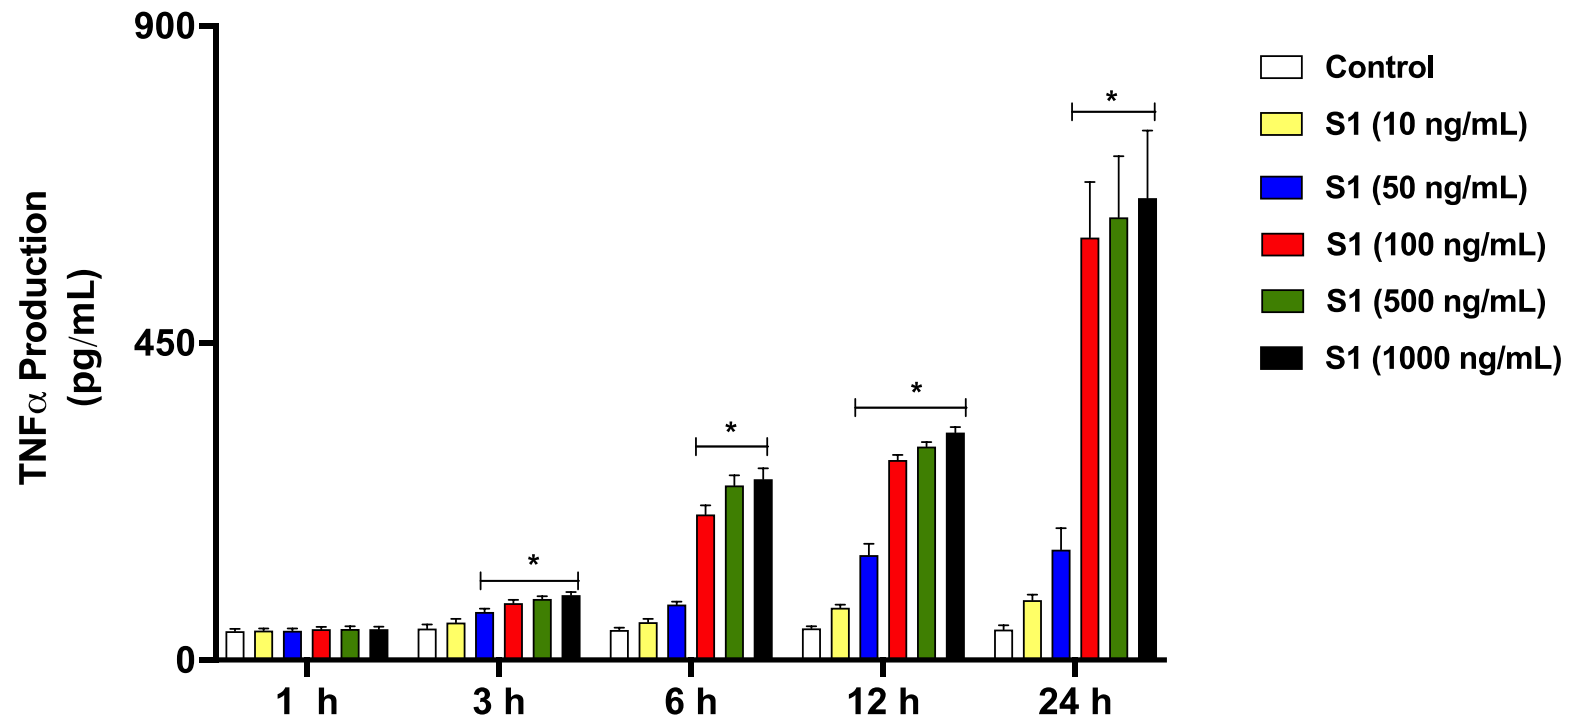

Supplement: 12035_2021_2593_MOESM1_ESM.pdf [file 12035_2021_2593_MOESM1_ESM.pdf]
